# Supplementary figures and images for: Temperature dependent electrochemical investigations of molybdenum and tungsten oxobisdithiolene complexes
Source: Royal Society of Chemistry journal article supplement (doi:10.1039/b414853c), 2005-01-01

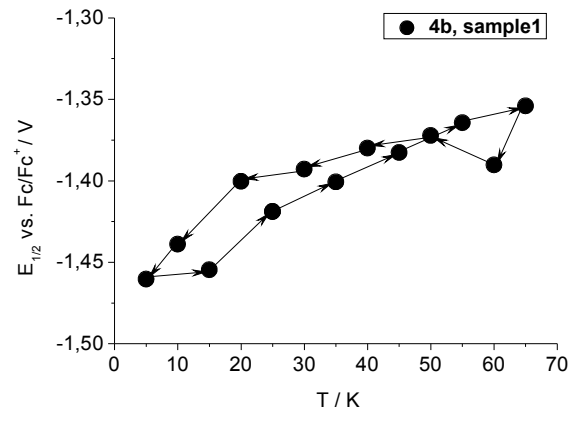

Supplement: b414853c.pdf [file b414853c.pdf]
